# Supplementary material for: Lipocalin 2 increases after high‐intensity exercise in humans and influences muscle gene expression and differentiation in mice
Source: PubMed Central journal article supplement — J Cell Physiol. 2021 Jul 5;237(1):551–65. doi: 10.1002/jcp.30501 (PMC9291458; doi:10.1002/jcp.30501), 2021-07-05
Supplement: JCP-237-551-s001.pdf [file JCP-237-551-s001.pdf]

**A**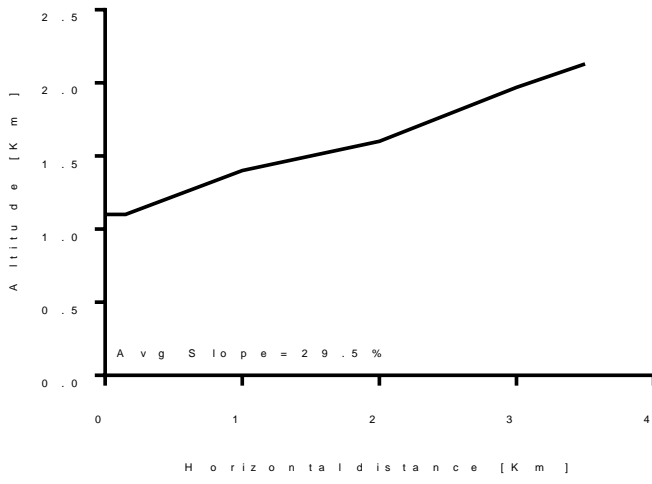**B**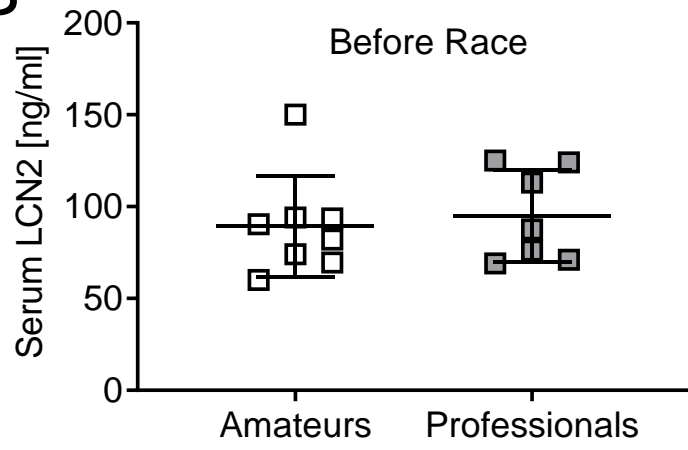

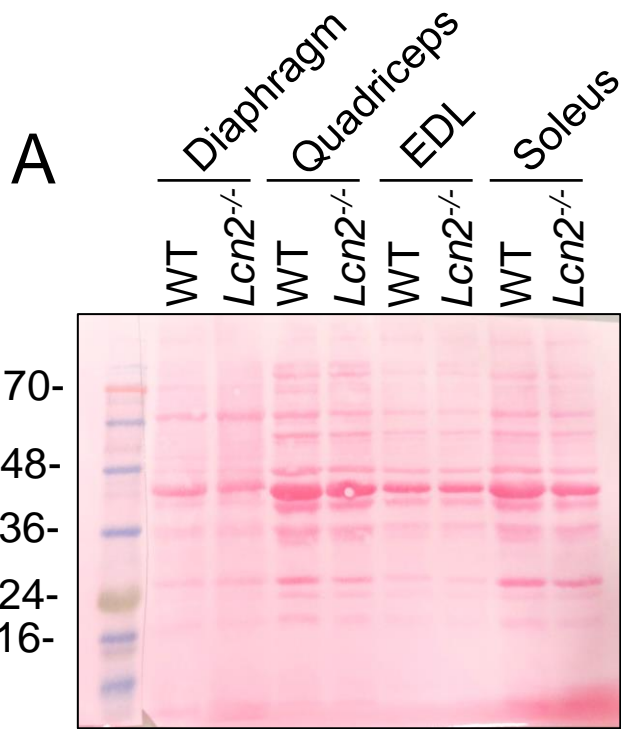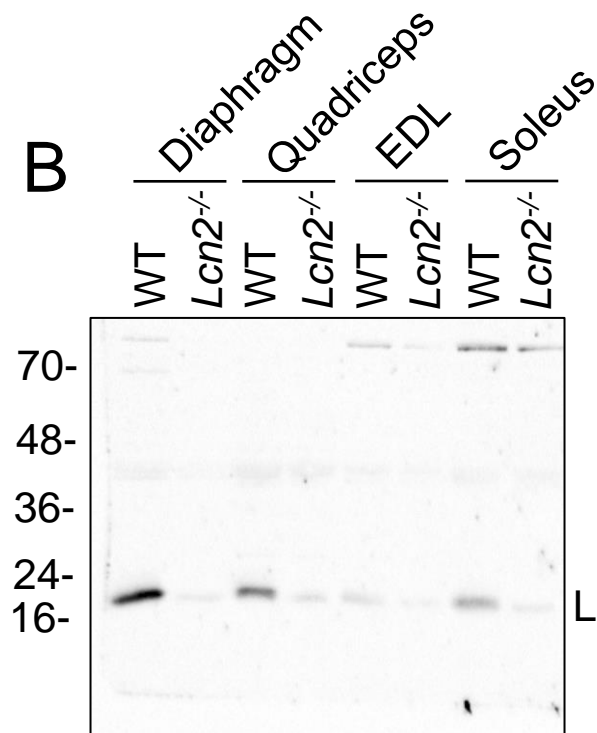

Lcn2 expected  
MW:22KDa

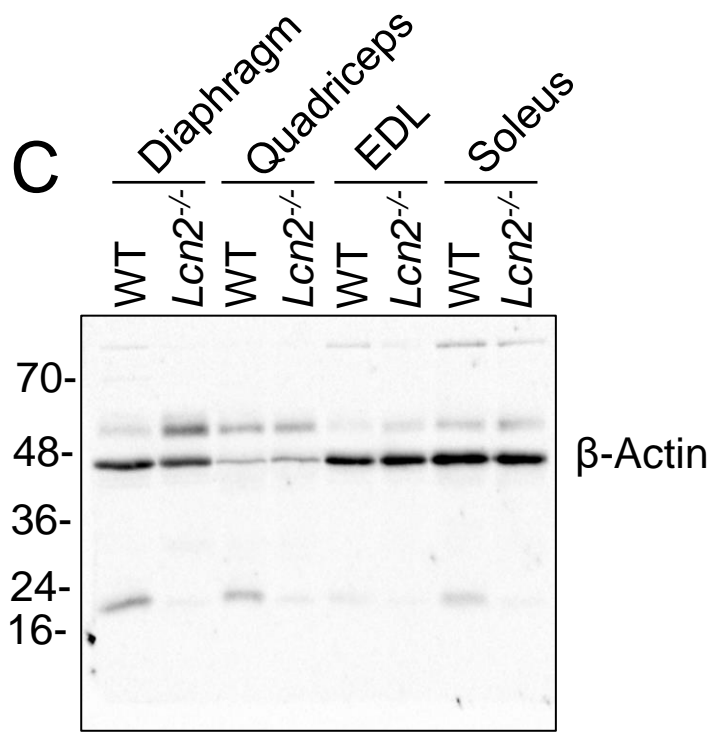

β-Actin expected  
MW:42KDa

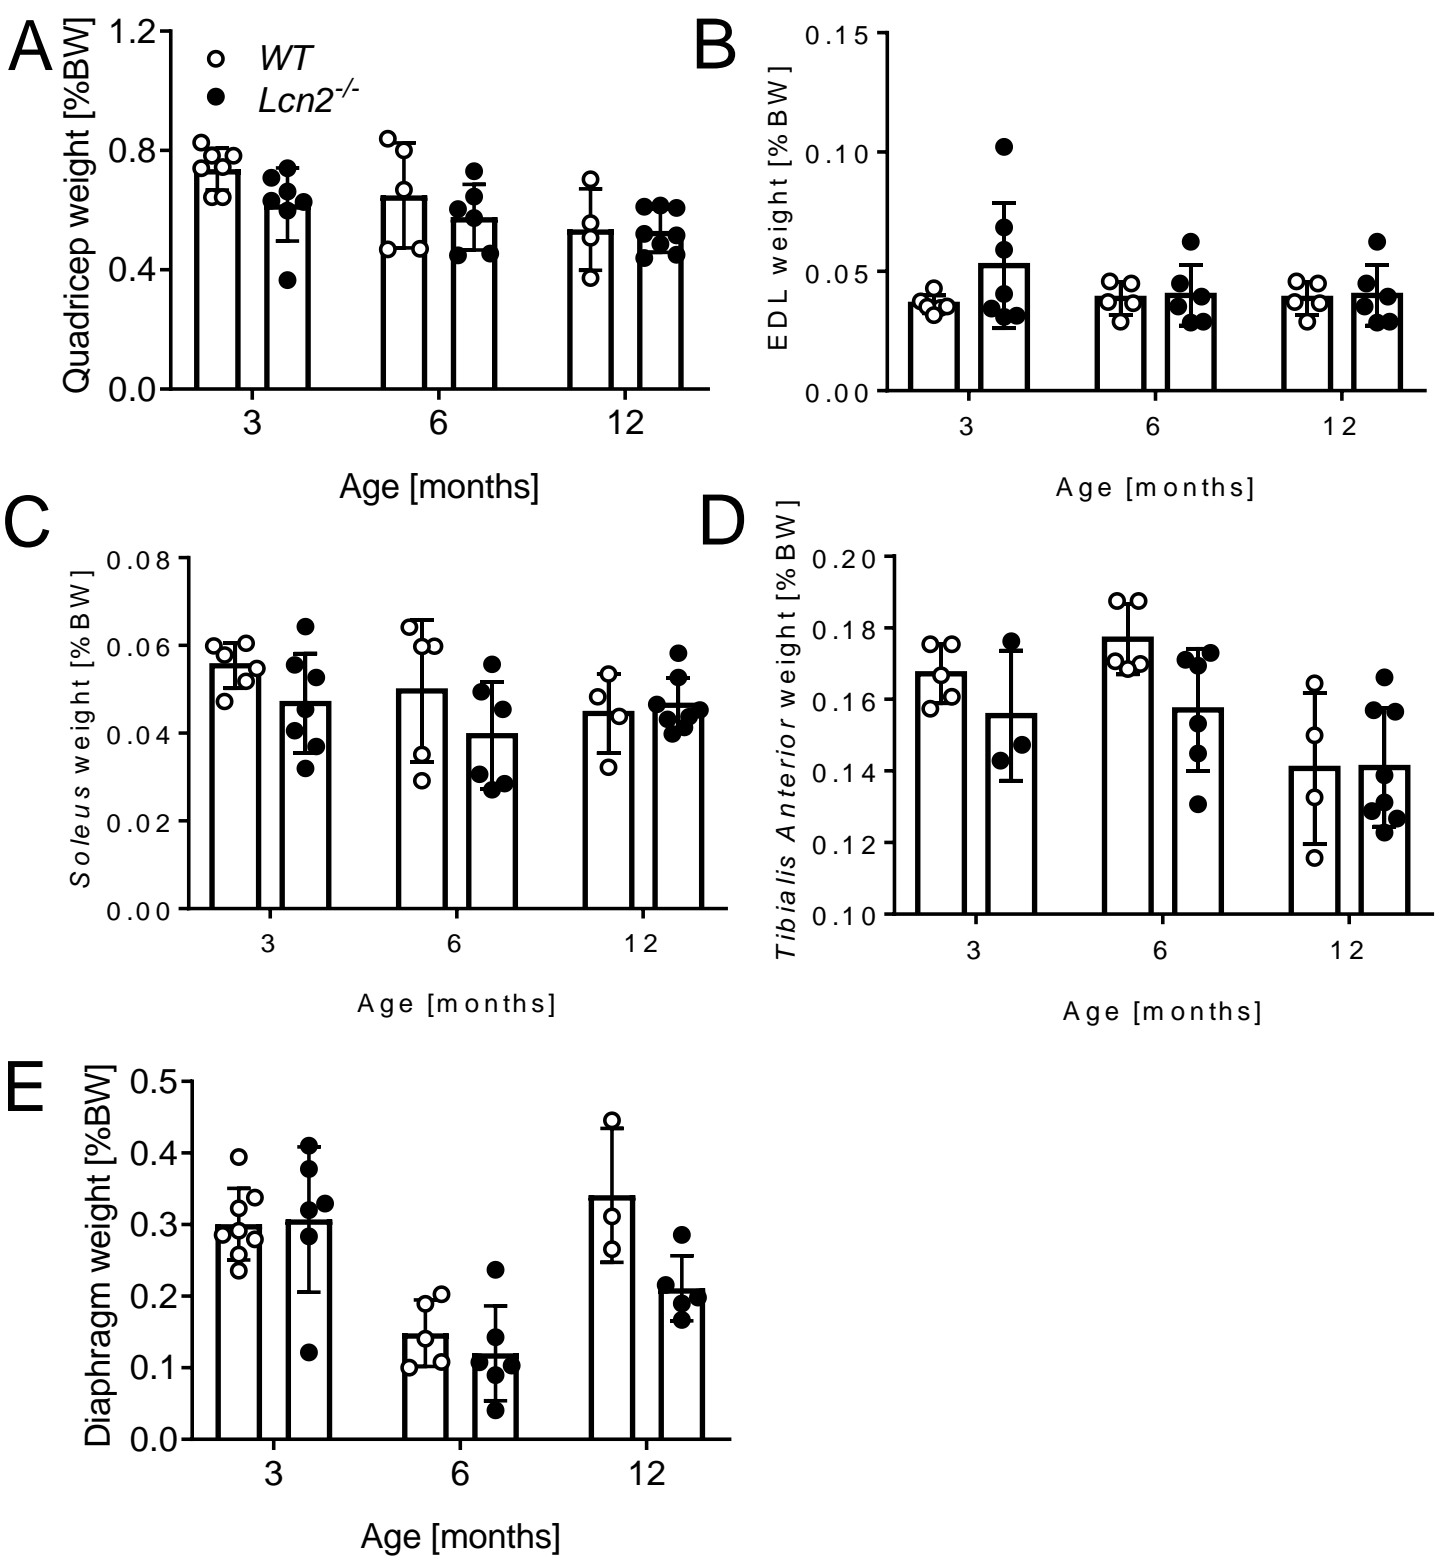

□ WT  
■ *Lcn2*<sup>-/-</sup>

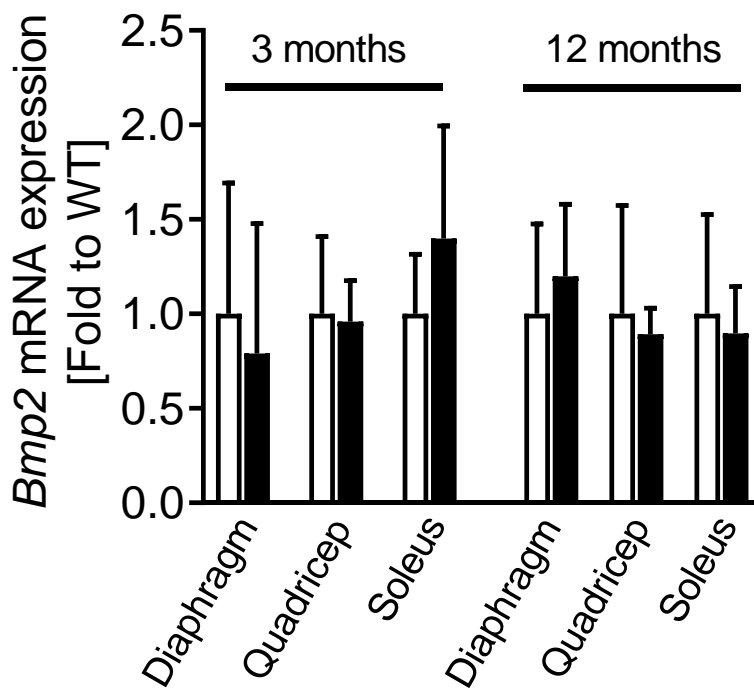

High-intensity exercise → ↑CK and Myoglobin release  
↑LCN2 release  
↑DKK1 release  
↑IL6 release

*Lcn2* genetic removal → Normal muscle function  
↓IL6 release  
↓Muscle fibre size

rLcn2 treatment → ↓%myotubes ↑%myoblasts  
↓*Myod* and *Myogenin*
