# Supplementary material for: Lipocalin 2 increases after high‐intensity exercise in humans and influences muscle gene expression and differentiation in mice
Source: PubMed Central journal article supplement — J Cell Physiol. 2021 Jul 5;237(1):551–65. doi: 10.1002/jcp.30501 (PMC9291458; doi:10.1002/jcp.30501), 2021-07-05
Supplement: JCP-237-551-s002.pdf [file JCP-237-551-s002.pdf]

**Supplementary Figure 1:** (A) Schematic representation of the Gran Sasso D'Italia vertical run, consisting of a race covering a horizontal distance of 3.6 km, while ascending for 1030 m, averaging 29.5% slope. Blood was collected right before and after the race. (B) Serum levels of LCN2 before the race between amateur and professional runners. Unpaired Student's *t*-test.

**Supplementary Figure 2: Lcn2 expression in mouse muscle tissues.** Western blot analyses were run on diaphragm, quadricep, EDL and *soleus* muscle tissue lysates as described in main Figure 2. (A) Ponceau S staining of the blot. (B) Full blot signal after overnight incubation (at 4°C) with anti-LCN2 antibody. (C) Full blot signal after 1h incubation (at R.T.) with anti-β-actin. Stripping was not performed between the two incubations.

**Supplementary Figure 3: Effect of the lack of Lcn2 on muscle phenotype.** After sacrifice, (A) quadricep, (B) EDL, (C) *soleus*, (D) *tibialis anterior* and (E) diaphragm muscles from WT and *Lcn2*<sup>-/-</sup> mice (at the ages indicated in the abscissa) were weighted and plotted as % of body weight. Curve fitting test.

**Supplementary Figure 4: Bmp2 transcriptional expression in WT and *Lcn2*<sup>-/-</sup> muscles.** RNA was extracted from 3- and 12-month-old WT and *Lcn2*<sup>-/-</sup> mice muscles. One µg of total RNA was reverse transcribed into cDNA and used to analyse transcriptional expression of bone morphogenic protein 2 (*Bmp2*) by real time RT-PCR. N=3-5 per group. Student's *t*-test.

**Supplementary Figure 5: Schematic representation of the findings of the present study.**
